# Supplementary material for: Combined Effect of Homocysteine and Uric Acid to Identify Patients With High Risk for Subclinical Atrial Fibrillation
Source: PubMed Central journal article supplement — J Am Heart Assoc. 2021 Dec 31;11(1):e021997. doi: 10.1161/JAHA.121.021997 (PMC9075184; doi:10.1161/jaha.121.021997), 2021-12-31
Supplement: JAH3-11-e021997-s001.pdf [file JAH3-11-e021997-s001.pdf]

# **SUPPLEMENTAL MATERIAL**

**Table S1. Risk factors for incident AF recommended by the 2020 ESC guideline for AF.**

|                                           |                          |                                              |                          |
|-------------------------------------------|--------------------------|----------------------------------------------|--------------------------|
| <b>Demographic factors</b>                | Age                      | <b>Health factors and other risk factors</b> | Hypertension             |
|                                           | Male sex                 |                                              | Systolic blood pressure  |
| <b>Health behaviors</b>                   | Smoking/tobacco use      |                                              | Diastolic blood pressure |
|                                           | Alcohol intake           |                                              | Diabetes mellitus        |
| <b>Cardiovascular conditions/diseases</b> | HF                       |                                              | Renal dysfunction/CKD    |
|                                           | Valvular disease         |                                              | Obesity                  |
|                                           | CAD                      |                                              | Body mass index          |
| <b>Disorders of heart rhythm</b>          | PR interval prolongation |                                              | Height                   |
|                                           | Sick sinus syndrome      |                                              | Weight                   |
| <b>LA remodeling</b>                      | Left atrial dimension    |                                              | COPD                     |

AF indicates atrial fibrillation; CAD, coronary artery disease; CKD, chronic kidney disease; COPD, chronic obstructive pulmonary disease; HF, heart failure; LA, left atrium.

**Table S2. Baseline characteristics of entire patient groups for other biomarkers.**

| Variable                    | Male             |                     |                 |             | Female           |                     |                 |             |
|-----------------------------|------------------|---------------------|-----------------|-------------|------------------|---------------------|-----------------|-------------|
|                             | Total<br>(n=605) | non-SCAF<br>(n=482) | SCAF<br>(n=123) | P-<br>value | Total<br>(n=619) | non-SCAF<br>(n=517) | SCAF<br>(n=102) | P-<br>value |
| WBC, $\times 10^9/L$        | 6.4 (5.3-7.4)    | 6.4 (5.3-7.5)       | 6.3 (5.2-7.4)   | 0.903       | 6.0 (5.0-7.3)    | 6.0 (5.0-7.4)       | 5.8 (4.9-7.2)   | 0.29        |
| Neutrophil, $\times 10^9/L$ | 3.8 (3.0-4.9)    | 3.8 (3.0-4.9)       | 3.9 (3.1-5.0)   | 0.839       | 3.5 (2.7-4.6)    | 3.5 (2.7-4.6)       | 3.3 (2.5-4.6)   | 0.202       |
| NLR                         | 2.2 (1.7-3.1)    | 2.2 (1.7-3.1)       | 2.2 (1.7-3.0)   | 0.779       | 1.9 (1.4-2.6)    | 1.9 (1.4-2.6)       | 1.8 (1.3-2.7)   | 0.723       |
| TG, mmol/L                  | 1.2 (0.8-1.5)    | 1.2 (0.8-1.5)       | 1.2 (0.9-1.7)   | 0.646       | 1.3 (0.9-1.7)    | 1.3 (0.9-1.7)       | 1.2 (0.9-1.5)   | 0.064       |
| TC, mmol/L                  | 4.4 (3.7-5.0)    | 4.4 (3.7-5.0)       | 4.4 (3.5-5.1)   | 0.961       | 4.9 (4.2-5.6)    | 4.9 (4.2-5.6)       | 4.6 (4.0-5.4)   | 0.085       |
| LDL, mmol/L                 | 2.4 (1.9-2.9)    | 2.4 (1.9-2.9)       | 2.4 (1.9-2.9)   | 0.824       | 2.7 (2.2-3.2)    | 2.7 (2.2-3.2)       | 2.7 (2.2-3.2)   | 0.328       |
| HDL, mmol/L                 | 1.1 (0.9-1.3)    | 1.1 (0.9-1.3)       | 1.1 (1.0-1.3)   | 0.442       | 1.2 (1.0-1.4)    | 1.2 (1.0-1.5)       | 1.2 (1.0-1.4)   | 0.195       |
| LP(a), mg/L                 | 5.3 (4.8-6.3)    | 5.3 (4.8-6.3)       | 5.3 (4.7-6.3)   | 0.996       | 5.2 (4.7-6.0)    | 5.2 (4.7-6.1)       | 5.0 (4.7-5.7)   | 0.571       |
| FBG, mmol/L                 | 5.3 (4.8-6.3)    | 5.3 (4.8-6.3)       | 5.3 (4.7-6.3)   | 0.459       | 5.2 (4.7-6.0)    | 5.2 (4.7-6.1)       | 5.0 (4.7-5.7)   | 0.206       |
| BNP, $\mu\text{mol/L}$      | 116 (56-326)     | 115 (54-304)        | 116 (65-416)    | 0.325       | 118 (58-301)     | 116 (58-288)        | 133 (63-309)    | 0.518       |

Values are reported as median values (interquartile range).

BNP indicates brain natriuretic peptide; FPG, fasting plasma glucose; HDL, high-density lipoprotein;

LDL, low-density lipoprotein; LP(a), lipoprotein (a); NLR, neutrophil/lymphocyte ratio; TC, total cholesterol and, TG, triglyceride; WBC, white cell count.

**Table S3. Hazard ratios for the association between Homocysteine and Uric acid with SCAF.**

|        |     | per 1-SD increase    |                      |                      | High level group vs. Low level |                      |                      |
|--------|-----|----------------------|----------------------|----------------------|--------------------------------|----------------------|----------------------|
|        |     | Model 1              | Model 2              | Model 3              | Model 1                        | Model 2              | Model 3              |
| Male   | UA  | 1.62 (1.36, 1.93)*** | 1.64 (1.37, 1.97)*** | 1.69 (1.37, 2.08)*** | 1.93 (1.35, 2.77)***           | 1.99 (1.39, 2.85)*** | 2.00 (1.36, 2.95)*** |
|        | Hcy | 1.34 (1.18, 1.51)*** | 1.38 (1.18, 1.51)*** | 1.27 (1.11, 1.44)*** | 1.98 (1.33, 2.94)***           | 1.98 (1.32, 2.96)**  | 1.92 (1.26, 2.92)**  |
| Female | UA  | 1.77 (1.51, 2.08)*** | 1.79 (1.52, 2.11)*** | 1.93 (1.57, 2.36)*** | 2.30 (1.54, 3.43)***           | 2.29 (1.53, 3.44)*** | 2.22 (1.44, 3.43)*** |
|        | Hcy | 1.39 (1.25, 1.53)*** | 1.38 (1.25, 1.53)*** | 1.39 (1.25, 1.54)*** | 2.00 (1.31, 3.04)**            | 1.99 (1.30, 3.04)**  | 1.92 (1.25, 2.95)**  |

\*:  $p \leq 0.05$ ; \*\*:  $p \leq 0.01$ ; \*\*\*:  $p \leq 0.001$ .

Model 1, crude; model 2, adjustment for age; model 3, full-adjustment model (adjustment for age, BMI, systolic blood pressure, diastolic blood pressure, estimated glomerular filtration rate, congestive heart failure, diabetes, coronary artery disease, chronic obstructive pulmonary disease, smoking, drinking, left atrial diameter, left ventricular ejection fraction).

**Figure S1. Analysis of the residuals of Schoenfeld residuals to assess the proportionality assumption.**

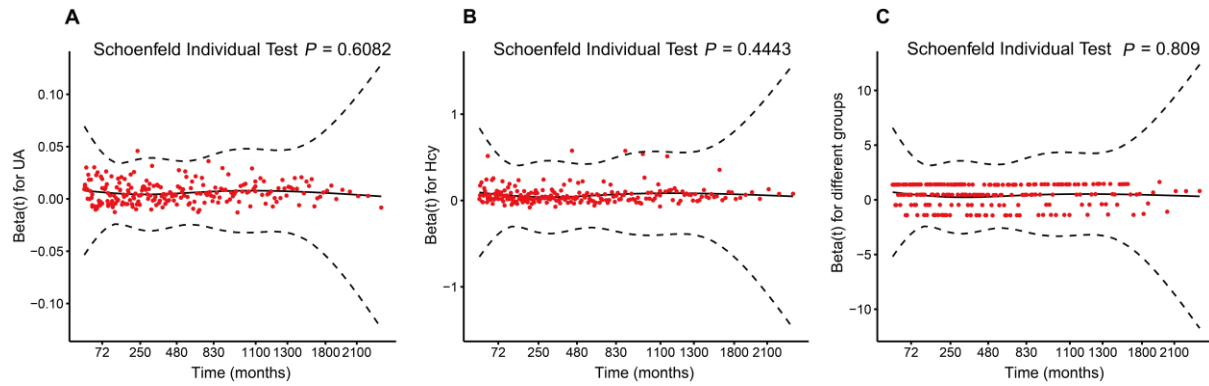

Figures represent plots of beta-coefficient estimates (log hazard ratios) for uric acid(A), homocysteine(B) and four categories of these two variables(C) against follow-up (time) in months. The black solid line represents a smoothed curve of scaled Schoenfeld residuals with 95% confidence intervals (black dotted lines). (A) uric acid; (B) homocysteine; (C) four categories of predictor: Group 1: patients with both low-level Hcy and UA; Group 2: patients with high-level UA and low-level Hcy; Group 3: patients with high-level Hcy and low-level of UA; Group 4: patients with both high-level of Hcy and UA.
